# Supplementary material for: Predicting the synergy of multiple stress effects
Source: PubMed Central journal article supplement (PMC5017025; doi:10.1038/srep32965), 2016-09-09
Supplement: srep32965-s1.pdf [file srep32965-s1.pdf]

## Supplementary Information

# Predicting the synergy of multiple stress effects

Matthias Liess,<sup>1,2\*</sup> Kaarina Foit,<sup>1</sup> Saskia Knillmann,<sup>1</sup> Ralf B. Schäfer,<sup>3</sup> Hans-Dieter Liess<sup>4</sup>

### Affiliation:

<sup>1</sup> UFZ, Helmholtz Centre f. Environmental Research, Dept. System-Ecotoxicology, Permoserstr. 15, 04318 Leipzig, Germany

<sup>2</sup> RWTH Aachen University, Institute for Environmental Research (Biology V), Worringerweg 1, 52074 Aachen, Germany

<sup>3</sup> University Koblenz-Landau, Institute for Environmental Sciences, Fortstrasse 7, 76829 Landau in der Pfalz, Germany

<sup>4</sup> University of the Bundeswehr München, Faculty EIT, Werner-Heisenberg-Weg 39, 85577 Neubiberg, Germany

\*Correspondence to: [matthias.liess@ufz.de](mailto:matthias.liess@ufz.de)

**Table S1 | List of studies included for meta-analysis.** Stress determined as the difference between control survival without and with environmental stress (Environment. stressor-mortality (%), based on fitted curves, see Figure S1) and sensitivity data (LC10 and LC50 using log-logistic concentration-response curves). LC10-Shift and LC50-Shift calculated as the concentration of LCx without environmental stress divided by the concentration of LCx\* with environmental stress. MoA (Mode of Action): VGSC - voltage gated sodium channel modulator; FFR - formation free radicals, reducing reactive oxygen species; AChE - acetylcholinesterase inhibitor. The meta-analysis comprised 23 pairs of concentration-response relationships. These pairs included 6 different environmental stressors, 5 toxicants and 10 species.

| Study ID | Reference | Species                  | Toxicant - substance | Toxicant - MoA | Toxicant - type of exposure | Environmental stressor - type | Environment. stressor - mortality (%) | Time after toxic. exposure (d) | LC10-Shift | LC50-Shift |
|----------|-----------|--------------------------|----------------------|----------------|-----------------------------|-------------------------------|---------------------------------------|--------------------------------|------------|------------|
| 1        | 27        | <i>Daphnia magna</i>     | Fenvalerate          | VGSC mod.      | pulse                       | Food limitation               | 0.0                                   | 8                              | 2.1        | 1.8        |
| 2        | 28        | <i>Daphnia magna</i>     | Fenvalerate          | VGSC mod.      | pulse                       | Maternal food                 | 0.0                                   | 7                              | 3.1        | 2.6        |
| 3        | 29        | <i>Bufo americanus</i>   | Malathion            | AChE inhi.     | continuous                  | Predator cues                 | 0.0                                   | 10                             | 1.3        | 1.1        |
| 4        | 29        | <i>Rana pipiens</i>      | Malathion            | AChE inhi.     | continuous                  | Predator cues                 | 0.0                                   | 7                              | 1.2        | 1.5        |
| 5        | 19        | <i>Ephoron virgo</i>     | Copper               | FFR, RROS      | continuous                  | Low oxygen                    | 0.0                                   | 4                              | 5.0        | 2.0        |
| 6        | 30        | <i>Cloeon dipterum</i>   | Esfenvalerate        | VGSC mod.      | pulse                       | Food limitation               | 0.0                                   | 8                              | 4.7        | 1.4        |
| 7        | 29        | <i>Rana sylvatica</i>    | Malathion            | AChE inhi.     | continuous                  | Predator cues                 | 0.0                                   | 5                              | 1.1        | 1.0        |
| 8        | 31        | <i>Rana pipiens</i>      | Carbaryl             | AChE inhi.     | continuous                  | Predator cues                 | 0.0                                   | 8                              | 1.4        | 1.1        |
| 9        | 11        | <i>Paramoera walkeri</i> | Copper               | FFR, RROS      | continuous                  | Food limitation               | 0.6                                   | 21                             | 1.2        | 1.1        |
| 10       | 31        | <i>Rana clamitans</i>    | Carbaryl             | AChE inhi.     | continuous                  | Predator cues                 | 1.0                                   | 9                              | 7.6        | 3.7        |
| 11       | 31        | <i>Rana catesbeiana</i>  | Carbaryl             | AChE inhi.     | continuous                  | Predator cues                 | 1.0                                   | 7                              | 3.6        | 1.9        |
| 12       | 31        | <i>Bufo americanus</i>   | Carbaryl             | AChE inhi.     | continuous                  | Predator cues                 | 1.5                                   | 9                              | 4.0        | 1.4        |
| 13       | 29        | <i>Rana clamitans</i>    | Malathion            | AChE inhi.     | continuous                  | Predator cues                 | 2.4                                   | 12                             | 1.0        | 1.3        |
| 14       | 31        | <i>Hyla versicolor</i>   | Carbaryl             | AChE inhi.     | continuous                  | Predator cues                 | 2.5                                   | 7                              | 1.0        | 1.2        |
| 15       | 29        | <i>Rana catesbeiana</i>  | Malathion            | AChE inhi.     | continuous                  | Predator cues                 | 6.1                                   | 7                              | 0.4        | 0.9        |
| 16       | 30        | <i>Cloeon dipterum</i>   | Esfenvalerate        | VGSC mod.      | pulse                       | Food limitation               | 6.7                                   | 8                              | 12.9       | 2.0        |
| 17       | 29        | <i>Hyla versicolor</i>   | Malathion            | AChE inhi.     | continuous                  | Predator cues                 | 13.3                                  | 10                             | 5.1        | 2.2        |
| 18       | 11        | <i>Paramoera walkeri</i> | Copper               | FFR, RROS      | continuous                  | Food limitation               | 13.9                                  | 21                             | 13.0       | 12.5       |
| 19       | 32        | <i>Daphnia</i> spp.      | Esfenvalerate        | VGSC mod.      | pulse                       | Intrasp. compet.              | 22.8                                  | 4                              | 3.6        | 1.6        |
| 20       | 33        | <i>Hyla versicolor</i>   | Carbaryl             | AChE inhi.     | continuous                  | Predator cues                 | 24.5                                  | 16                             | 17.6       | 7.7        |
| 21       | 34        | <i>Daphnia</i> spp.      | Esfenvalerate        | VGSC mod.      | pulse                       | Water level alt.              | 37.7                                  | 8                              | 26.4       | 17.3       |
| 22       | 32        | <i>Daphnia</i> spp.      | Esfenvalerate        | VGSC mod.      | pulse                       | Intrasp. compet.              | 42.1                                  | 4                              | 51.8       | 5.9        |
| 23       | 11        | <i>Paramoera walkeri</i> | Copper               | FFR, RROS      | continuous                  | UV radiation                  | 47.9                                  | 21                             | 140.8      | 42.1       |

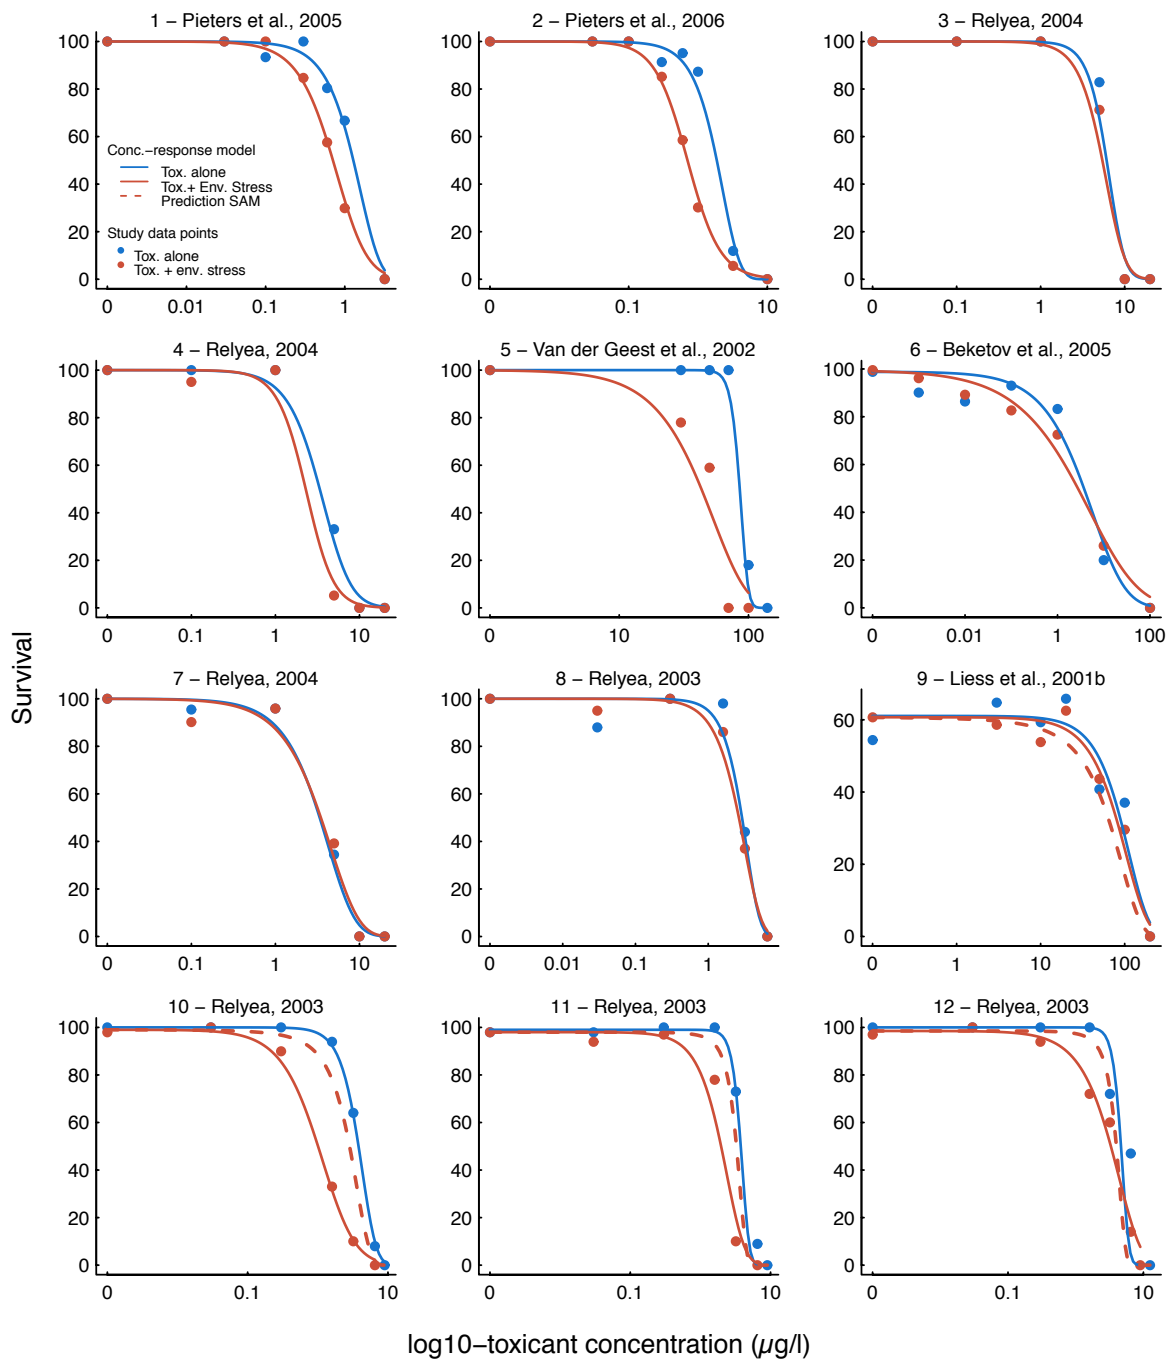

Figure S1 | Survival data from the meta-analysis.

— Continued on next page —

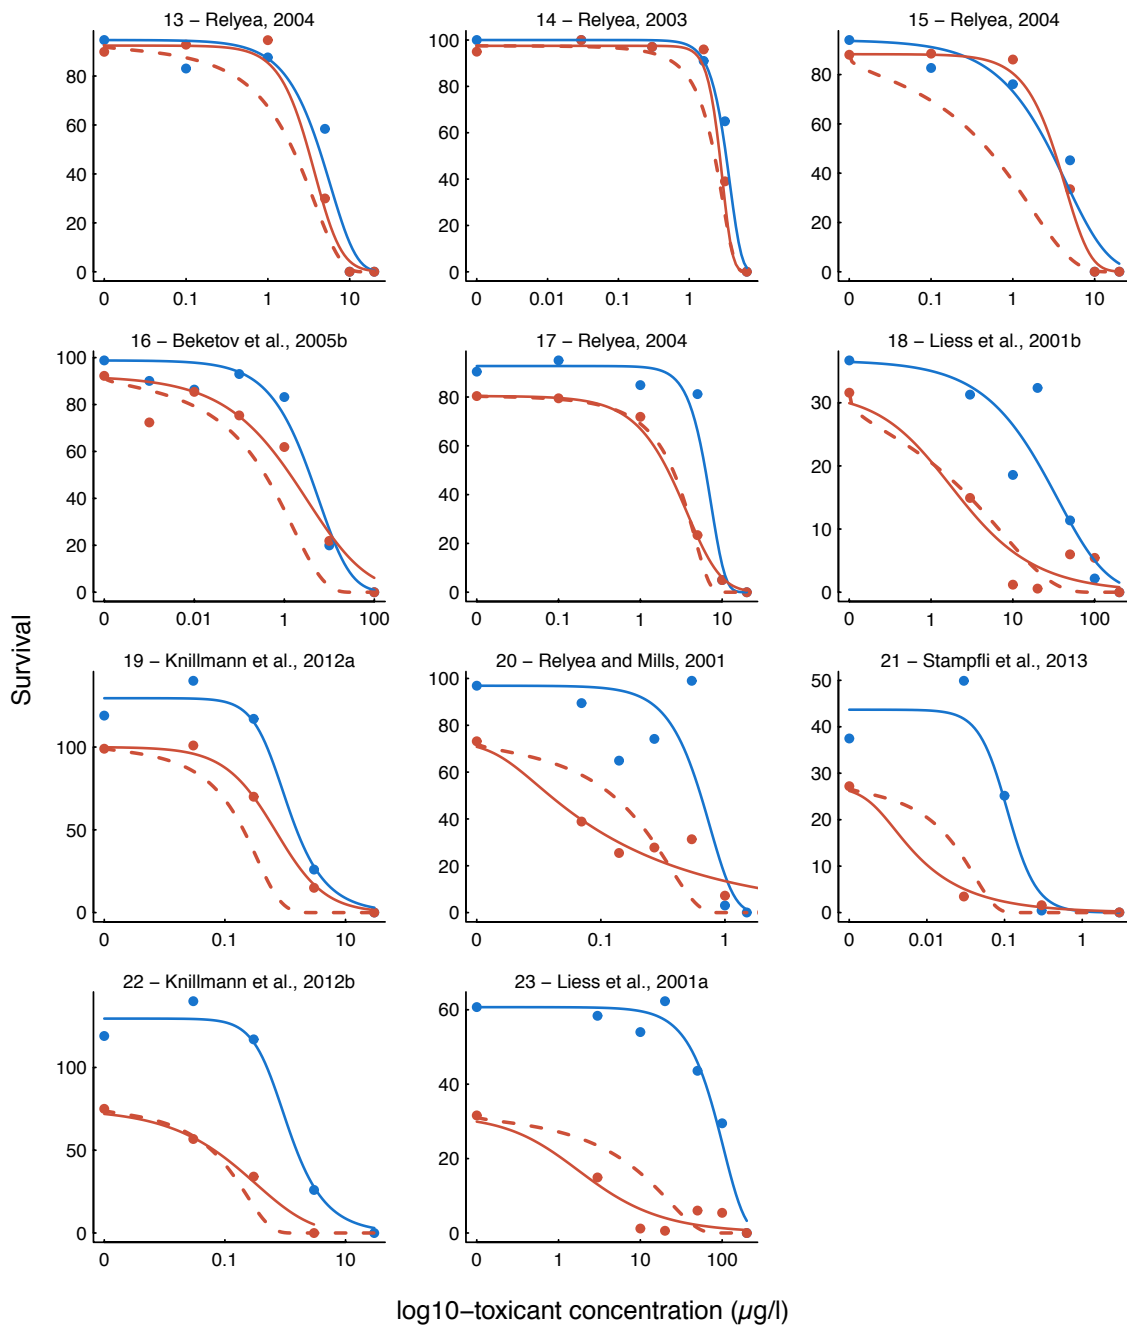

**Figure S1 | Survival data from the meta-analysis.** Concentration-response relationships observed from empirical studies. Pairs of concentration-response relationships are displayed - without environmental stress (blue points, line) and with environmental stress (red points, line). Survival is either given as % survival of the control or as number of individuals, as provided from the original publication. The red dashed line represents the modelled concentration-response relationship under environmental stress using the SAM approach. The SAM modelling was only performed when the environmental stress resulted in mortality greater than 1%.

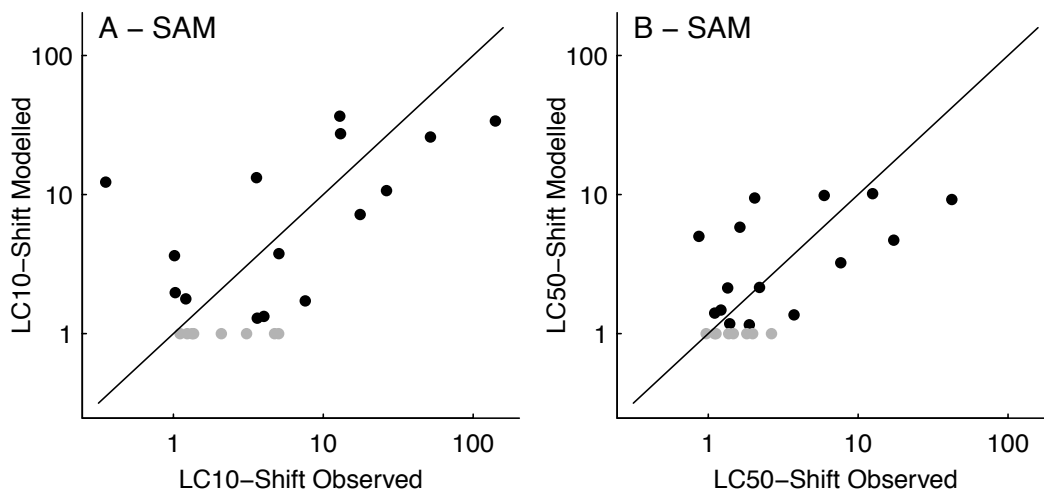

**Figure S2** | SAM-modelled shifts of LC10 and LC50 in comparison to observations based on the study specific concentration-response curves from each of the 23 studies in the meta-analysis. The toxicant sensitivity is expressed as shift of the LCx (A: LC10/LC10\*; B: LC50/LC50\*). The environmental stress of studies resulted in a mortality greater than 0 % (black points) or equal to 0 % (grey points). The diagonal lines represent the ideal correlation (45° line). Goodness of fit was quantified as  $R^2$  that gives the proportion of variance explained by the model (A:  $R^2 = 0.49$ ; B:  $R^2 = 0.38$ ). For quantification we considered only those studies with observed environmental stress mortality greater than 0% (black points) and positive shifts of LC10 and LC50.

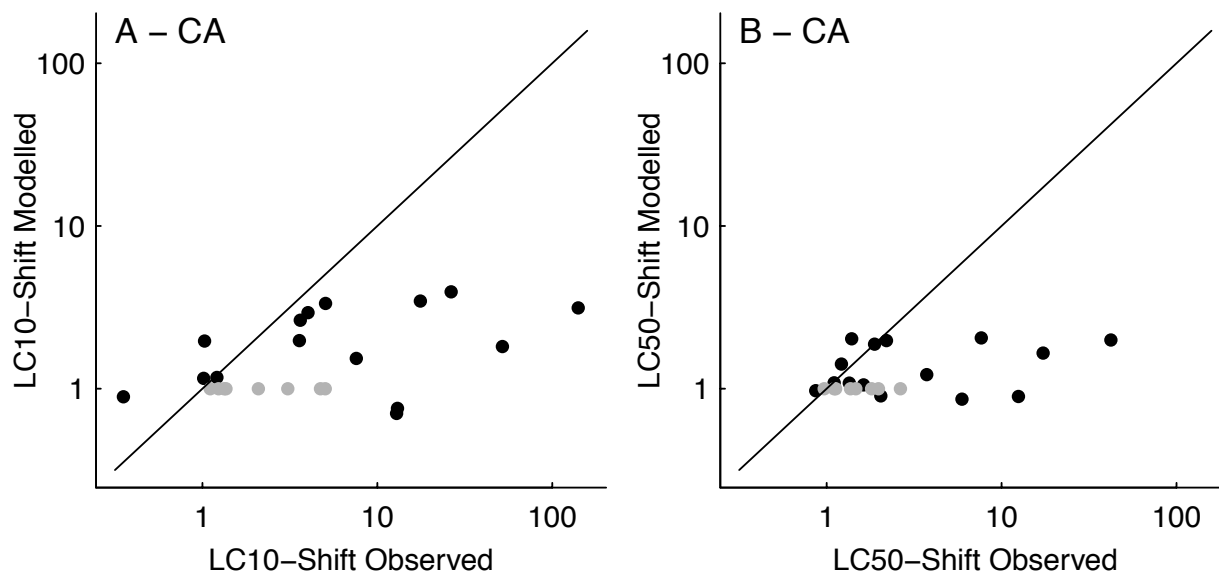

**Figure S3** | CA-modelled shifts of LC10 and LC50 in comparison to observations based on the study specific concentration-response curves from each of the 23 studies in the meta-analysis. The toxicant sensitivity is expressed as shift of the LCx (A: LC10/LC10\*; B: LC50/LC50\*). The environmental stress of studies resulted in a mortality greater than 0 % (black points) or equal to 0 % (grey points). The diagonal lines represent the ideal correlation (45° line). Goodness of fit was quantified as  $R^2$  that gives the proportion of variance explained by the model (A:  $R^2 = -0.88$ ; B:  $R^2 = -0.77$ ; with negative  $R^2$  indicating that CA is better explained by the average of observations). For quantification we considered only those studies with observed environmental stress mortality greater than 0% (black points) and positive shifts of LC10 and LC50.

## References:

- 27 Pieters, B. J. *et al.* Influence of food limitation on the effects of Fenvalerate pulse exposure on the life history and population growth rate of *Daphnia magna*. *Environmental Toxicology and Chemistry* **24**, 2254-2259 (2005).
- 28 Pieters, B. J. & Liess, M. Maternal nutritional state determines the sensitivity of *Daphnia magna* offspring to short-term Fenvalerate exposure. *Aquat Toxicol* **76**, 268-277, doi:10.1016/j.aquatox.2005.09.013 (2006).
- 29 Relyea, R. A. Synergistic impacts of malathion and predatory stress on six species of North American tadpoles. *Environ Toxicol Chem* **23**, 1080-1084, doi:10.1897/03-259 (2004).
- 30 Beketov, M. A. & Liess, M. Acute contamination with esfenvalerate and food limitation: chronic effects on the mayfly, *Cloeon dipterum*. *Environ Toxicol Chem* **24**, 1281-1286 (2005).
- 31 Relyea, R. A. Predator cues and pesticides: A double dose of danger for amphibians. *Ecological Applications* **13**, 1515-1521 (2003).
- 32 Knillmann, S., Stampfli, N. C., Beketov, M. A. & Liess, M. Intraspecific competition increases toxicant effects in outdoor pond microcosms. *Ecotoxicology* **21**, 1857-1866, doi:10.1007/s10646-012-0919-y (2012).
- 33 Relyea, R. A. & Mills, N. Predator-induced stress makes the pesticide carbaryl more deadly to gray treefrog tadpoles (*Hyla versicolor*). *Proceedings of the National Academy of Sciences of the United States of America* **98**, 2491-2496, doi:Doi 10.1073/Pnas.031076198 (2001).
- 34 Stampfli, N. C. *et al.* Two stressors and a community: effects of hydrological disturbance and a toxicant on freshwater zooplankton. *Aquat Toxicol* **127**, 9-20, doi:10.1016/j.aquatox.2012.09.003 (2013).
